# Supplementary material for: Controlling the anisotropic self-assembly of polybutadiene-grafted silica nanoparticles by tuning three-body interaction forces
Source: Royal Society of Chemistry journal article supplement (doi:10.1039/d2sm00943a), 2022-01-01
Supplement: d2sm00943a1.pdf [file d2sm00943a1.pdf]

## SUPPLEMENTARY INFORMATION

### Controlling the anisotropic self-assembly of polybutadiene-grafted silica nanoparticles by tuning three-body interaction forces

Barbara Di Credico,<sup>\*a</sup> Gerardo Odriozola,<sup>b</sup> Simone Mascotto,<sup>c</sup> Andreas Meyer,<sup>d</sup> Laura Tripaldi<sup>a</sup>  
and Arturo Moncho-Jordá<sup>\*ef</sup>

<sup>a</sup> *Department of Materials Science, INSTM, University of Milano-Bicocca, Via R. Cozzi, 55, 20125 Milano, Italy.  
Tel: +39-02-64485189. E-mail: [barbara.dicredico@unimib.it](mailto:barbara.dicredico@unimib.it)*

<sup>b</sup> *Área de Física de Procesos Irreversibles, División de Ciencias Básicas e Ingeniería, Universidad Autónoma Metropolitana-Azcapotzalco, Av. San Pablo 180, 02200 Ciudad de México, Mexico*

<sup>c</sup> *Institut für Anorganische und Angewandte Chemie, Universität Hamburg, Martin-Luther-King-Platz 6, 20146 Hamburg, Germany.*

<sup>d</sup> *Institut für Physikalische Chemie, Universität Hamburg, Grindelallee 117, 20146 Hamburg, Germany.*

<sup>e</sup> *Institute Carlos I for Theoretical and Computational Physics, Facultad de Ciencias, Universidad de Granada, Campus Fuentenueva S/N, 18071 Granada, Spain. E-mail: [moncho@ugr.es](mailto:moncho@ugr.es)*

<sup>f</sup> *Departamento de Física Aplicada, Universidad de Granada, Campus Fuentenueva S/N, 18071 Granada, Spain.*

Characterization is crucial for synthesizing HNPs with specific molecular parameters, revealing their structures, understanding their behavior and properties, and using them in specific applications. The HNPs structures, behavior, and properties are mainly governed by molecular weights, dispersity, grafting density, polymer topology, size, and geometry of core NPs, etc. Accurate characterization of basic defining parameters and other aspects of HNPs require the use of a broad range of characterization techniques.

Here, we characterize the nanoparticles by means of TGA, SAXS, and TEM analyses.

#### TGA ANALYSIS

The thermal degradation profile was obtained under the following conditions: constant airflow (50 mLmin<sup>-1</sup>) and heating rate of 5°Cmin<sup>-1</sup> in the range 30-150°C, constant airflow (50 mL min<sup>-1</sup> at 150°C for 10 min, constant airflow (50 mLmin<sup>-1</sup>) and heating rate of 10°C min<sup>-1</sup> in the range 150-1000°C.

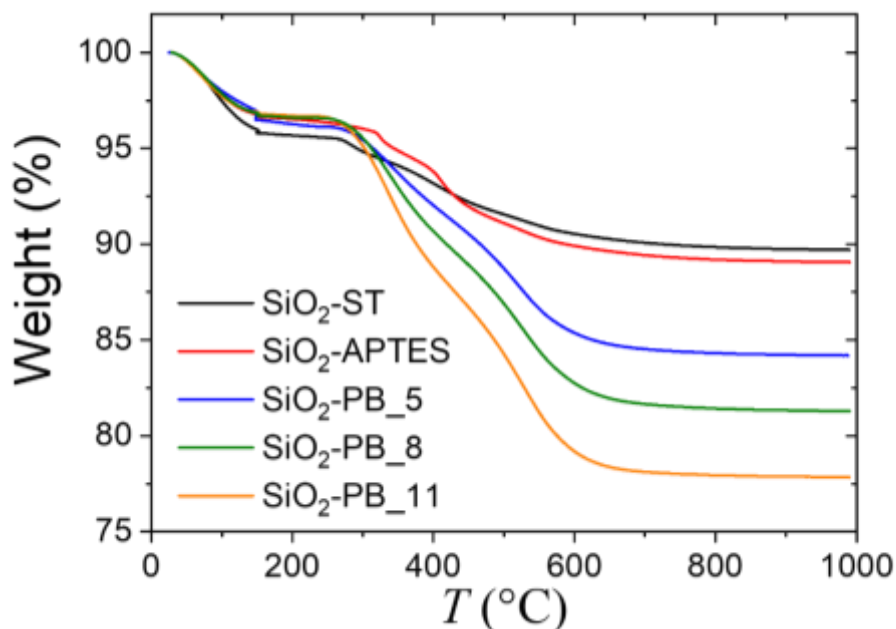

**Figure S1:** TGA weight loss curves of SiO<sub>2</sub>-ST, SiO<sub>2</sub>-APTES, and SiO<sub>2</sub>-HNP\_X.

## SAXS ANALYSIS

SAXS measurements were conducted with an Incoatec<sup>TM</sup> X-ray source I $\mu$ S with Quazar Montel optics at a wavelength of 0.154 nm. The focal spot size diameter at the sample was 700  $\mu$ m. The sample to detector distance was 1.6 m with an evacuated flight tube installed, providing a maximum resolution (d-spacing) of 120 nm. A CCD-Detector Rayonix<sup>TM</sup> SX165 was employed for the detection of the 2D scattering patterns. The regular measurement time per sample accounted for 20 min. SPEC (ver. 5.32) by Certified Scientific Software, Cambridge, MA, USA was employed as control software. Dispersions of SiO<sub>2</sub>-ST and SiO<sub>2</sub>-HNP\_X in THF for SAXS analysis were prepared by suspending 5 wt% of SiO<sub>2</sub> particles in THF by ultrasonication for 1 h.

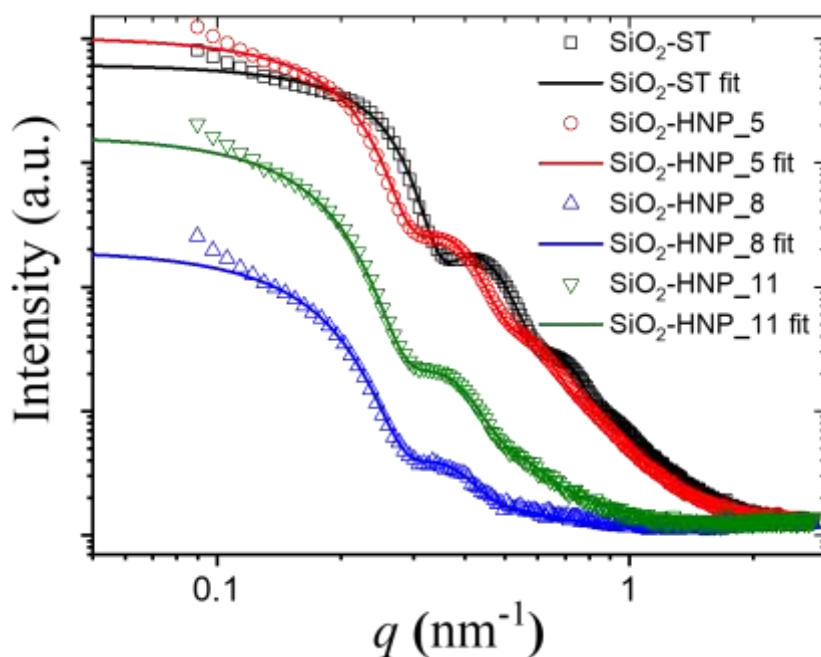

**Figure S2:** SAXS curves and fitting of bare SiO<sub>2</sub>-ST and SiO<sub>2</sub>-HNP\_X, with X=5 8 and 11.

## TEM ANALYSIS

Morphology of silica powders was investigated by TEM analysis, performed on a JEOL JEM 2100+ equipped with a LaB6 cathode. Images were taken at different magnifications with the TEM operated in bright-field parallel imaging mode at 200 keV.

We present below additional TEM micrographs that show the overall tendency of finding more string-like structures when increasing the concentration of grafted polymer. Some of the pictures were taken with one order of magnification larger to confirm the existence of these self-assembled structures. As observed below, uncovered silica NPs self-assemble into compact clusters. By increasing the concentration of grafted polymer, the formation of more anisotropic superstructures are detectable. For the largest polymer concentration studied in this work, we find that HNPs self-organize forming chains.

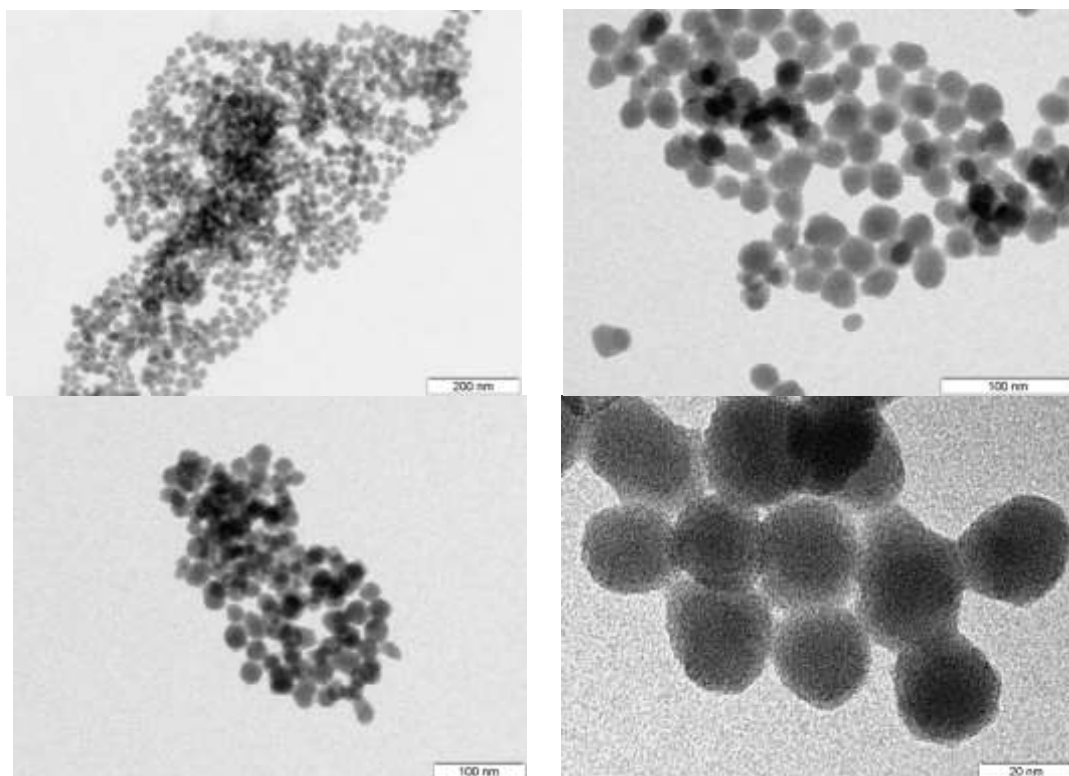

**Figure S3:** TEM images of SiO<sub>2</sub>-ST sample.

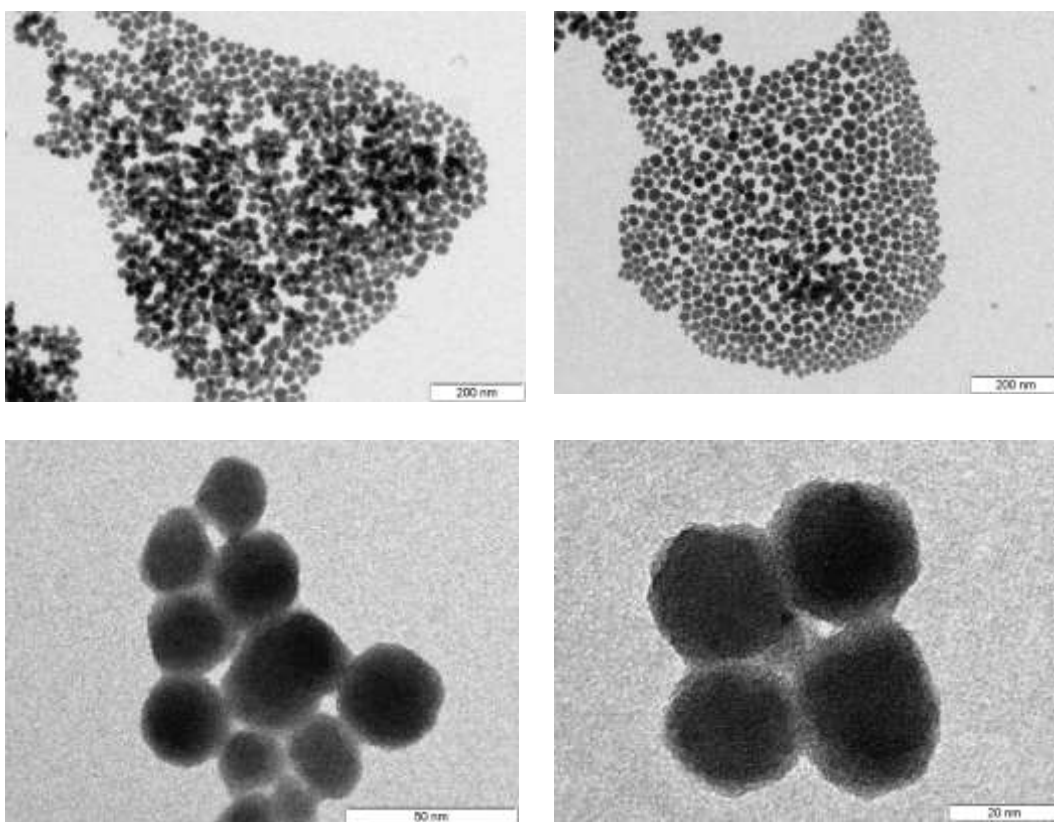

**Figure S4:** TEM images of  $\text{SiO}_2$ -APTES sample.

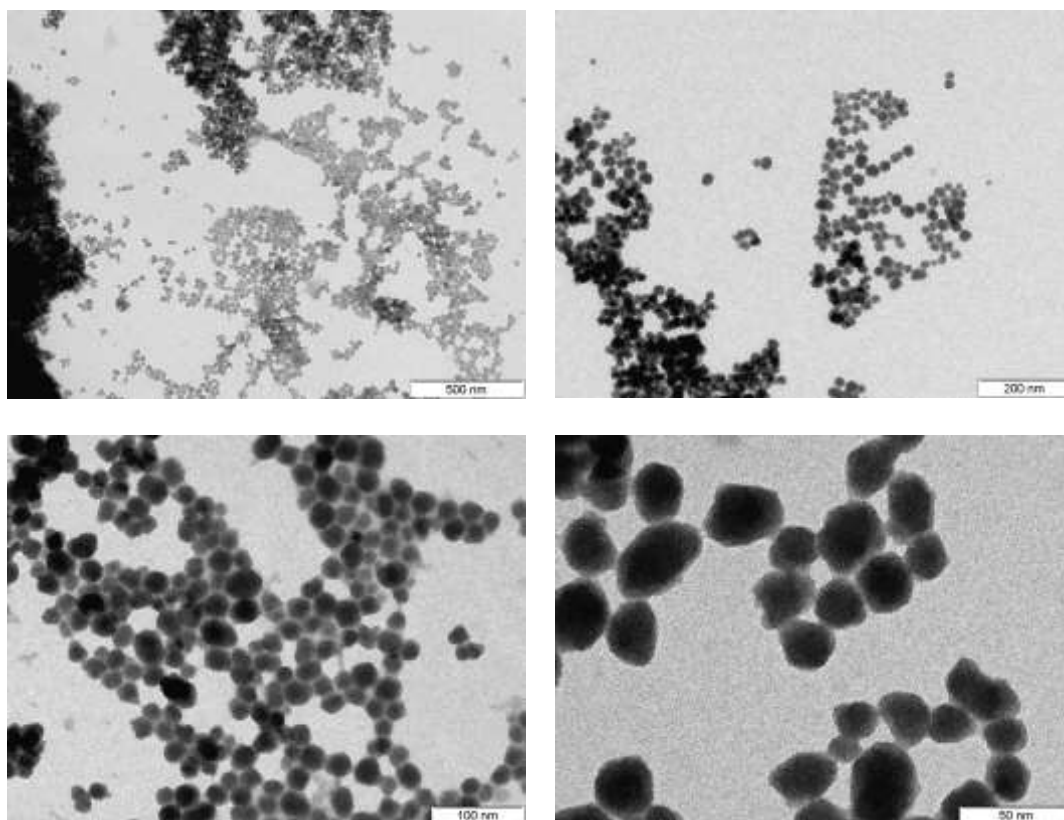

**Figure S5:** TEM images of SiO<sub>2</sub>-HNP\_5 sample.

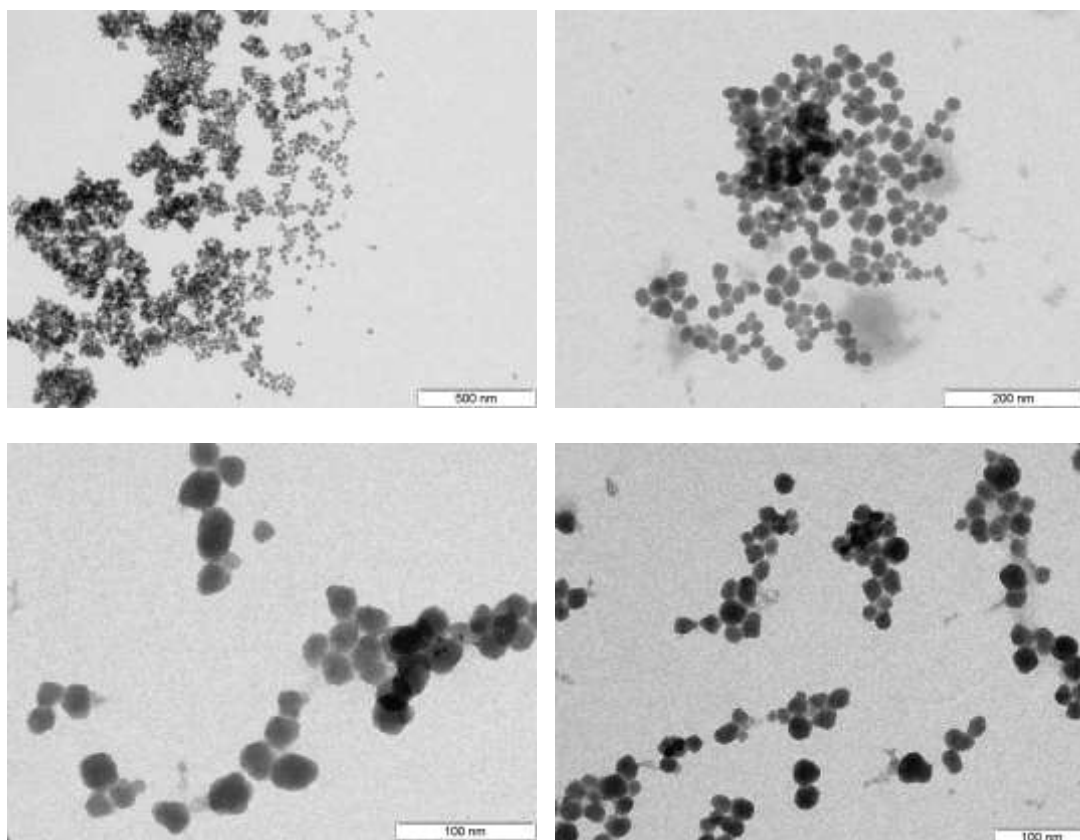

**Figure S6:** TEM images of SiO<sub>2</sub>-HNP\_8 sample.

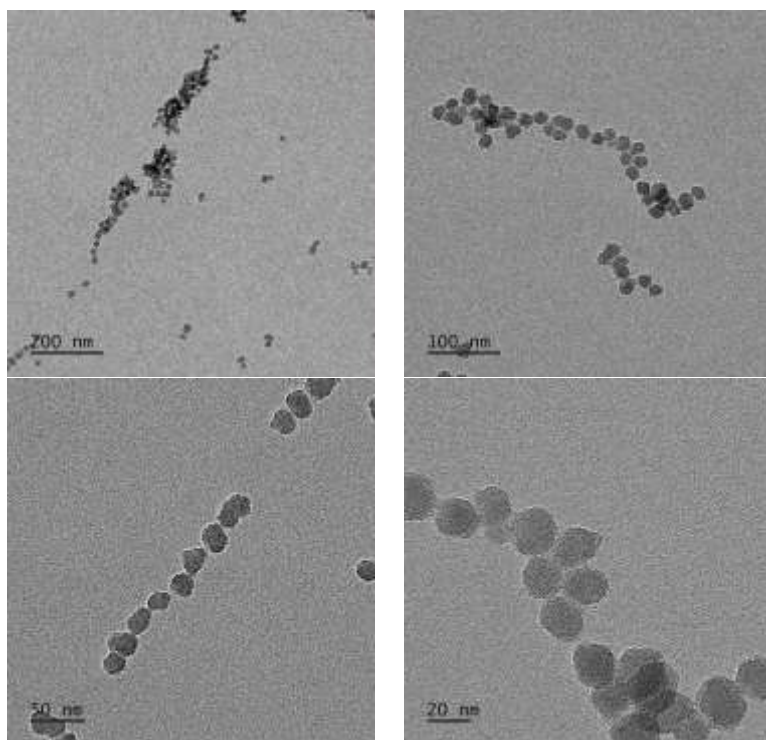

**Figure S7:** TEM images of SiO<sub>2</sub>-HNP\_11 sample.
